# Supplementary material
Source: PubMed Central journal article supplement (PMC2915485)
Supplement: kwq093_1.pdf [file kwq093_1.pdf]

**Web Table 1.** Adjusted\* odds ratios (95% confidence interval) for risk of high coronary calcification (CAC) and common carotid artery intima media thickness (IMT) (>90<sup>th</sup> percentile, respectively) at year 20 according to categories of BMI at year 0, year 10, and year 20 of the CARDIA Study

| Outcome:                      |                | Categories of BMI measured at specific year (kg/m <sup>2</sup> ) |               |               |               |                | P <sub>trend</sub> | P <sub>quadratic</sub> |
|-------------------------------|----------------|------------------------------------------------------------------|---------------|---------------|---------------|----------------|--------------------|------------------------|
|                               |                | <22                                                              | 22-<25        | 25-<30        | 30-<35        | ≥35            |                    |                        |
| <b>CAC at year 20</b>         |                |                                                                  |               |               |               |                |                    |                        |
| >0 (cases=413)                | BMI at year 0  | Ref                                                              | 1.3 (0.9-1.8) | 1.6 (1.1-2.2) | 1.6 (1.0-2.7) | 1.7 (0.8-3.6)  | <0.01              | 0.36                   |
|                               | BMI at year 10 | Ref                                                              | 0.6 (0.4-0.8) | 0.9 (0.6-1.2) | 1.0 (0.7-1.6) | 1.0 (0.6-1.7)  | 0.30               | 0.09                   |
|                               | BMI at year 20 | Ref                                                              | 0.8 (0.5-1.2) | 0.7 (0.5-1.1) | 1.0 (0.6-1.7) | 1.5 (0.9-2.5)  | <0.01              | <0.01                  |
| >10 (cases=290)               | BMI at year 0  | Ref                                                              | 1.1 (0.7-1.6) | 1.7 (1.1-2.5) | 1.5 (0.8-2.7) | 1.9 (0.8-4.3)  | 0.01               | 0.72                   |
|                               | BMI at year 10 | Ref                                                              | 0.5 (0.3-0.7) | 0.7 (0.5-1.1) | 0.9 (0.5-1.5) | 0.7 (0.4-1.4)  | 0.92               | 0.13                   |
|                               | BMI at year 20 | Ref                                                              | 0.6 (0.3-1.0) | 0.5 (0.3-0.9) | 0.7 (0.4-1.2) | 0.9 (0.5-1.6)  | 0.55               | <0.01                  |
| >20 (cases=223)               | BMI at year 0  | Ref                                                              | 0.9 (0.6-1.4) | 1.7 (1.1-2.5) | 1.3 (0.7-2.4) | 2.1 (0.9-5.0)  | 0.02               | 1.00                   |
|                               | BMI at year 10 | Ref                                                              | 0.4 (0.2-0.7) | 0.7 (0.4-1.1) | 0.8 (0.5-1.4) | 0.6 (0.3-1.3)  | 0.81               | 0.18                   |
|                               | BMI at year 20 | Ref                                                              | 0.5 (0.3-1.0) | 0.5 (0.3-0.9) | 0.7 (0.4-1.2) | 0.8 (0.4-1.4)  | 0.99               | 0.02                   |
| >40 (cases=172)               | BMI at year 0  | Ref                                                              | 0.8 (0.5-1.2) | 1.4 (0.9-2.2) | 0.8 (0.4-1.7) | 1.5 (0.5-4.0)  | 0.34               | 0.95                   |
|                               | BMI at year 10 | Ref                                                              | 0.5(0.3-0.8)  | 0.7 (0.4-1.1) | 0.7 (0.3-1.2) | 0.8 (0.3-1.3)  | 0.44               | 0.26                   |
|                               | BMI at year 20 | Ref                                                              | 0.7 (0.3-1.3) | 0.6 (0.3-1.0) | 0.7 (0.3-1.3) | 0.6 (0.3-1.3)  | 0.33               | 0.19                   |
| <b>IMT at year 20</b>         |                |                                                                  |               |               |               |                |                    |                        |
| >70 <sup>th</sup> (cases=674) | BMI at year 0  | Ref                                                              | 1.3 (1.0-1.7) | 2.0 (1.5-2.6) | 2.7 (1.7-4.1) | 1.8 (1.0-3.3)  | <0.01              | 0.13                   |
|                               | BMI at year 10 | Ref                                                              | 1.1 (0.8-1.6) | 1.6 (1.2-2.2) | 2.2 (1.5-3.3) | 2.4 (1.6-3.7)  | <0.01              | 0.84                   |
|                               | BMI at year 20 | Ref                                                              | 1.2 (0.7-1.9) | 1.4 (0.9-2.2) | 2.2 (1.4-3.7) | 3.0 (1.8-4.9)  | <0.01              | 0.29                   |
| >80 <sup>th</sup> (cases=449) | BMI at year 0  | Ref                                                              | 1.4 (1.0-2.0) | 2.4 (1.7-3.3) | 3.2 (2.0-5.1) | 2.5 (1.3-4.8)  | <0.01              | 0.07                   |
|                               | BMI at year 10 | Ref                                                              | 1.1 (0.7-1.7) | 1.7 (1.2-2.5) | 2.1 (1.3-3.2) | 3.1 (1.9-5.1)  | <0.01              | 0.66                   |
|                               | BMI at year 20 | Ref                                                              | 1.1 (0.6-2.0) | 1.3 (0.8-2.4) | 2.1 (1.1-3.7) | 3.5 (1.9-6.5)  | <0.01              | 0.06                   |
| >90 <sup>th</sup> (cases=225) | BMI at year 0  | Ref                                                              | 2.0 (1.3-3.2) | 2.8 (1.8-4.5) | 3.8 (2.1-7.0) | 2.3 (0.9-5.4)  | <0.01              | <0.01                  |
|                               | BMI at year 10 | Ref                                                              | 0.9 (0.5-1.6) | 1.3 (0.8-2.1) | 1.6 (0.9-2.9) | 2.1 (1.1-4.0)  | <0.01              | 0.45                   |
|                               | BMI at year 20 | Ref                                                              | 1.6 (0.6-4.3) | 1.9 (0.7-4.8) | 3.4 (1.3-8.8) | 4.8 (1.9-12.4) | <0.01              | 0.71                   |

\*Adjusting for age, sex, race, study center, cigarette smoking, physical activity, systolic blood pressure, HDL cholesterol, LDL cholesterol, triglycerides, and fasting glucose.

Each covariate was measured at the same examination as the corresponding BMI. Shaded values were given in the main text.

**Web Table 2.** Adjusted\* odds ratios (95% confidence interval) for risk of high coronary calcification (CAC) at year 20 according to 3 indices of year 20 BMI and its history (BMI at year 0, slope of BMI from year 0 to year 20, and fluctuations in BMI during 20 years) in the CARDIA Study

| Agatston score  | Quintile of year 0 BMI (kg/m <sup>2</sup> , median)                                    |               |               |               |               | P <sub>trend</sub> |
|-----------------|----------------------------------------------------------------------------------------|---------------|---------------|---------------|---------------|--------------------|
|                 | Q1(19.8)                                                                               | Q2(21.6)      | Q3(23.4)      | Q4(25.3)      | Q5(29.7)      |                    |
| >0 (cases=413)  | Ref                                                                                    | 1.0 (0.7-1.6) | 1.4 (0.9-2.1) | 1.7 (1.1-2.6) | 2.0 (1.3-3.1) | <0.01              |
| >10 (cases=290) | Ref                                                                                    | 0.9 (0.6-1.6) | 1.2 (0.7-1.9) | 1.5 (0.9-2.4) | 1.7 (1.0-2.9) | <0.01              |
| >20 (cases=223) | Ref                                                                                    | 0.8 (0.4-1.4) | 1.1 (0.7-1.9) | 1.3 (0.8-2.1) | 1.6 (0.9-2.8) | 0.02               |
| >40 (cases=172) | Ref                                                                                    | 0.7 (0.3-1.3) | 0.9 (0.5-1.6) | 1.1 (0.6-2.0) | 1.3 (0.7-2.4) | 0.13               |
| Agatston score  | Quintile of linear slope of BMI from year 0 to year 20 (kg/m <sup>2</sup> /yr, median) |               |               |               |               | P <sub>trend</sub> |
|                 | Q1(0.01)                                                                               | Q2(0.12)      | Q3(0.21)      | Q4(0.32)      | Q5(0.54)      |                    |
| >0 (cases=413)  | Ref                                                                                    | 0.7 (0.5-1.0) | 0.5 (0.4-0.8) | 0.8 (0.5-1.1) | 0.6 (0.4-1.0) | 0.09               |
| >10 (cases=290) | Ref                                                                                    | 0.7 (0.5-1.1) | 0.4 (0.3-0.8) | 0.5 (0.3-0.8) | 0.5 (0.3-0.8) | <0.01              |
| >20 (cases=223) | Ref                                                                                    | 0.7 (0.4-1.0) | 0.4 (0.2-0.6) | 0.5 (0.3-0.8) | 0.4 (0.2-0.7) | <0.01              |
| >40 (cases=172) | Ref                                                                                    | 0.6 (0.4-1.0) | 0.3 (0.2-0.6) | 0.3(0.2-0.6)  | 0.3 (0.2-0.6) | <0.01              |
| Agatston score  | Quintile of fluctuations in BMI during 20 years (kg/m <sup>2</sup> , median)           |               |               |               |               | P <sub>trend</sub> |
|                 | Q1(0.49)                                                                               | Q2(0.77)      | Q3(1.05)      | Q4(1.46)      | Q5(2.34)      |                    |
| >0 (cases=413)  | Ref                                                                                    | 1.2 (0.8-1.8) | 1.0 (0.7-1.5) | 1.5 (1.0-2.2) | 1.5 (0.9-2.2) | 0.04               |
| >10 (cases=290) | Ref                                                                                    | 1.2 (0.8-1.9) | 1.2 (0.8-2.0) | 2.0 (1.3-3.2) | 1.7 (1.0-2.8) | <0.01              |
| >20 (cases=223) | Ref                                                                                    | 1.2 (0.7-1.9) | 1.1 (0.7-1.9) | 1.9 (1.2-3.2) | 1.8 (1.0-3.1) | <0.01              |
| >40 (cases=172) | Ref                                                                                    | 0.9 (0.5-1.6) | 1.1 (0.7-2.0) | 2.1 (1.2-3.6) | 1.8 (1.0-3.3) | <0.01              |

\* This table presents the results from 4 separate models with different cutoff points of high CAC.

Adjusted for age, sex, race, study center, cigarette smoking, physical activity, systolic blood pressure, HDL cholesterol, LDL cholesterol, triglycerides, and fasting glucose. Shaded values were given in the main text.

**Web Table 3.** Adjusted\* odds ratios (95% confidence interval) for risk of high common carotid artery intima media thickness (IMT) at year 20 according to 3 indices of year 20 BMI and its history (BMI at year 0, slope of BMI from year 0 to year 20, and fluctuations in BMI during 20 years in the CARDIA Study

| IMT                           | Quintile of year 0 BMI (kg/m <sup>2</sup> , median)                                    |               |               |               |               | P <sub>trend</sub> |
|-------------------------------|----------------------------------------------------------------------------------------|---------------|---------------|---------------|---------------|--------------------|
|                               | Q1(19.8)                                                                               | Q2(21.6)      | Q3(23.4)      | Q4(25.3)      | Q5(29.7)      |                    |
| >70 <sup>th</sup> (cases=674) | Ref                                                                                    | 1.8 (1.2-2.6) | 1.6 (1.1-2.3) | 2.0 (1.4-2.9) | 3.2 (2.2-4.6) | <0.01              |
| >80 <sup>th</sup> (cases=449) | Ref                                                                                    | 2.3 (1.4-3.6) | 2.1 (1.3-3.3) | 2.7 (1.7-4.3) | 4.4 (2.8-6.9) | <0.01              |
| >90 <sup>th</sup> (cases=225) | Ref                                                                                    | 1.2 (0.6-2.4) | 2.0 (1.0-3.7) | 2.6 (1.4-4.9) | 3.6 (2.0-6.8) | <0.01              |
| IMT                           | Quintile of linear slope of BMI from year 0 to year 20 (kg/m <sup>2</sup> /yr, median) |               |               |               |               | P <sub>trend</sub> |
|                               | Q1(0.01)                                                                               | Q2(0.12)      | Q3(0.21)      | Q4(0.32)      | Q5(0.54)      |                    |
| >70 <sup>th</sup> (cases=674) | Ref                                                                                    | 0.9 (0.7-1.3) | 1.3 (0.9-1.8) | 1.2 (0.8-1.7) | 1.4 (1.0-2.0) | 0.01               |
| >80 <sup>th</sup> (cases=449) | Ref                                                                                    | 0.8 (0.5-1.2) | 1.3 (0.8-1.9) | 1.4 (0.9-2.1) | 1.6 (1.0-2.4) | <0.01              |
| >90 <sup>th</sup> (cases=225) | Ref                                                                                    | 0.7 (0.4-1.2) | 1.4 (0.8-2.3) | 1.6 (0.9-2.6) | 1.8 (1.0-3.0) | <0.01              |
| IMT                           | Quintile of fluctuations in BMI during 20 years (kg/m <sup>2</sup> , median)           |               |               |               |               | P <sub>trend</sub> |
|                               | Q1(0.49)                                                                               | Q2(0.77)      | Q3(1.05)      | Q4(1.46)      | Q5(2.34)      |                    |
| >70 <sup>th</sup> (cases=674) | Ref                                                                                    | 1.2 (0.9-1.7) | 1.2 (0.9-1.7) | 1.4 (1.0-1.9) | 1.5 (1.0-2.1) | 0.03               |
| >80 <sup>th</sup> (cases=449) | Ref                                                                                    | 1.3 (0.9-2.0) | 1.3 (0.9-2.0) | 1.5 (1.0-2.2) | 1.5 (1.0-2.4) | 0.04               |
| >90 <sup>th</sup> (cases=225) | Ref                                                                                    | 0.9 (0.5-1.6) | 1.0 (0.6-1.6) | 0.9 (0.5-1.5) | 1.2 (0.7-2.1) | 0.55               |

\* This table presents the results from 4 separate models with different cutoff points of high IMT.

Adjusted for age, sex, race, study center, cigarette smoking, physical activity, systolic blood pressure, HDL cholesterol, LDL cholesterol, triglycerides, and fasting glucose. Shaded values were given in the main text.

**Web Table 4.** Adjusted\* odds ratios (95% confidence interval) for progression of coronary calcification (CAC) with 3 indices of year 15 BMI and its history (BMI at year 0, slope of BMI from year 0 to year 15, and fluctuations in BMI during 15 years) in the CARDIA Study

| Agatston score increase from year 15 to 20 | Quintile of year 0 BMI (kg/m <sup>2</sup> , median)                                    |               |               |               |               | P <sub>trend</sub> |
|--------------------------------------------|----------------------------------------------------------------------------------------|---------------|---------------|---------------|---------------|--------------------|
|                                            | Q1(19.8)                                                                               | Q2(21.6)      | Q3(23.4)      | Q4(25.3)      | Q5(29.7)      |                    |
| >0 (cases=407)                             | Ref.                                                                                   | 1.1 (0.7-1.7) | 1.3 (0.9-2.1) | 1.7 (1.1-2.5) | 1.9 (1.3-3.0) | 0.01               |
| >10 (cases=277)                            | Ref.                                                                                   | 0.9 (0.6-1.6) | 1.2 (0.7-2.0) | 1.3 (0.8-2.2) | 1.8 (1.0-3.0) | 0.01               |
| >20 (cases=207)                            | Ref.                                                                                   | 0.8 (0.4-1.5) | 0.9 (0.5-1.7) | 1.2 (0.7-2.0) | 1.5 (0.8-2.6) | 0.08               |
| >40 (cases=137)                            | Ref.                                                                                   | 0.6 (0.3-1.2) | 0.8 (0.4-1.6) | 0.7 (0.4-1.5) | 1.4 (0.7-2.7) | 0.17               |
|                                            | Quintile of linear slope of BMI from year 0 to year 15 (kg/m <sup>2</sup> /yr, median) |               |               |               |               |                    |
|                                            | Q1(-0.01)                                                                              | Q2(0.12)      | Q3(0.22)      | Q4(0.36)      | Q5(0.61)      | P <sub>trend</sub> |
| >0 (cases=407)                             | Ref.                                                                                   | 1.0 (0.7-1.4) | 0.8 (0.5-1.1) | 1.0 (0.7-1.4) | 0.7 (0.5-1.1) | 0.15               |
| >10 (cases=277)                            | Ref.                                                                                   | 0.9 (0.6-1.4) | 0.6 (0.4-0.9) | 0.7 (0.4-1.0) | 0.5 (0.3-0.8) | <0.01              |
| >20 (cases=207)                            | Ref.                                                                                   | 0.9 (0.6-1.4) | 0.6 (0.4-1.0) | 0.6 (0.3-0.9) | 0.4 (0.2-0.6) | <0.01              |
| >40 (cases=137)                            | Ref.                                                                                   | 0.8 (0.5-1.4) | 0.6 (0.3-1.0) | 0.4 (0.2-0.8) | 0.3 (0.1-0.6) | <0.01              |
|                                            | Quintile of fluctuations in BMI during 15 years (kg/m <sup>2</sup> , median)           |               |               |               |               |                    |
|                                            | Q1(0.40)                                                                               | Q2(0.69)      | Q3(0.96)      | Q4(1.35)      | Q5(2.17)      | P <sub>trend</sub> |
| >0 (cases=407)                             | Ref.                                                                                   | 0.9 (0.6-1.3) | 1.0 (0.7-1.4) | 1.5 (1.0-2.2) | 1.5 (0.9-2.2) | 0.01               |
| >10 (cases=277)                            | Ref.                                                                                   | 0.8 (0.5-1.3) | 1.1 (0.7-1.7) | 1.9 (1.2-3.0) | 1.5 (0.9-2.5) | <0.01              |
| >20 (cases=207)                            | Ref.                                                                                   | 1.0 (0.6-1.8) | 1.4 (0.8-2.3) | 1.9 (1.1-3.3) | 2.0 (1.1-3.6) | <0.01              |
| >40 (cases=137)                            | Ref.                                                                                   | 0.9 (0.5-1.8) | 1.4 (0.7-2.6) | 2.2 (1.1-4.3) | 2.1 (1.1-4.3) | <0.01              |

\* This table presents the results from 4 separate models with different cutoff points of progression of CAC from year 15 to year 20. Adjusted for age, sex, race, study center, cigarette smoking, physical activity, systolic blood pressure, HDL cholesterol, LDL cholesterol, triglycerides, and fasting glucose. Shaded values were given in the main text.

**Web Table 5.** Adjusted\* odds ratios (95% confidence interval) for risk of high coronary calcification (CAC) and common carotid artery intima media thickness (IMT) (each >90<sup>th</sup> percentile) at year 20 according to quintiles of waist circumference (WST) at years 0, 10, and 20 of the CARDIA Study

| Outcome: CAC at year 20 |                    | Quintiles of waist circumference measured at specific year |               |               |               |                | P <sub>trend</sub> | P <sub>quadratic</sub> |
|-------------------------|--------------------|------------------------------------------------------------|---------------|---------------|---------------|----------------|--------------------|------------------------|
|                         |                    | Q1                                                         | Q2            | Q3            | Q4            | Q5             |                    |                        |
| WST at year 0           | Cases/participants | 29/452                                                     | 31/433        | 38/456        | 51/463        | 74/439         |                    |                        |
|                         | Unadjusted %       | 6.4%                                                       | 7.2%          | 8.3%          | 11.0%         | 16.9%          |                    |                        |
|                         | Model 1            | Ref                                                        | 1.0 (0.6-1.7) | 1.2 (0.7-1.9) | 1.4 (0.8-2.2) | 2.4 (1.5-3.8)  | <0.01              | 0.05                   |
|                         | Model 2            | Ref                                                        | 0.9 (0.5-1.5) | 1.0 (0.6-1.6) | 1.0 (0.6-1.6) | 1.4 (0.8-2.4)  | 0.15               | 0.12                   |
| WST at year 10          | Cases/participants | 30/444                                                     | 40/459        | 48/444        | 36/444        | 69/452         |                    |                        |
|                         | Unadjusted %       | 6.8%                                                       | 8.7%          | 10.8%         | 8.1%          | 15.3%          |                    |                        |
|                         | Model 1            | Ref                                                        | 1.3 (0.8-2.1) | 1.4 (0.9-2.3) | 1.1 (0.7-1.9) | 2.4 (1.5-3.8)  | <0.01              | 0.23                   |
|                         | Model 2            | Ref                                                        | 1.2(0.7-2.0)  | 1.2 (0.7-2.0) | 0.8 (0.5-1.4) | 1.4 (0.8-2.4)  | 0.63               | 0.49                   |
| WST at year 20          | Cases/participants | 48/447                                                     | 33/455        | 39/449        | 45/445        | 58/447         |                    |                        |
|                         | Unadjusted %       | 10.7%                                                      | 7.3%          | 8.7%          | 10.1%         | 13.0%          |                    |                        |
|                         | Model 1            | Ref                                                        | 0.6 (0.3-0.9) | 0.7 (0.5-1.2) | 0.9 (0.6-1.4) | 1.1 (0.7-1.7)  | 0.22               | 0.01                   |
|                         | Model 2            | Ref                                                        | 0.5 (0.3-0.9) | 0.7 (0.4-1.1) | 0.8 (0.5-1.3) | 0.9 (0.6-1.5)  | 0.64               | 0.01                   |
| Outcome: IMT at year 20 |                    | Q1                                                         | Q2            | Q3            | Q4            | Q5             | P <sub>trend</sub> |                        |
| WST at year 0           | Cases/participants | 18/452                                                     | 26/433        | 42/456        | 56/463        | 83/439         |                    |                        |
|                         | Unadjusted %       | 4.0%                                                       | 6.0%          | 9.2%          | 12.1%         | 18.9%          |                    |                        |
|                         | Model 1            | Ref                                                        | 1.6 (0.8-2.9) | 2.6 (1.5-4.8) | 3.3 (1.8-5.8) | 5.4 (3.1-9.3)  | <0.01              | 0.88                   |
|                         | Model 2            | Ref                                                        | 1.5 (0.8-2.8) | 2.4 (1.3-4.4) | 2.8 (1.5-5.0) | 4.0 (2.2-7.2)  | <0.01              | 0.57                   |
| WST at year 10          | Cases/participants | 16/444                                                     | 29/459        | 44/444        | 57/444        | 79/452         |                    |                        |
|                         | Unadjusted %       | 3.6%                                                       | 6.3%          | 9.9%          | 12.8%         | 17.5%          |                    |                        |
|                         | Model 1            | Ref                                                        | 1.7 (0.9-3.3) | 2.6 (1.4-4.8) | 3.6 (2.0-6.6) | 4.9 (2.8-8.8)  | <0.01              | 0.35                   |
|                         | Model 2            | Ref                                                        | 1.6 (0.8-3.0) | 2.1 (1.1-3.9) | 2.5 (1.3-4.7) | 2.8 (1.5-5.2)  | <0.01              | 0.21                   |
| WST at year 20          | Cases/participants | 15/447                                                     | 26/455        | 35/449        | 59/445        | 90/447         |                    |                        |
|                         | Unadjusted %       | 3.4%                                                       | 5.7%          | 7.8%          | 13.3%         | 20.1%          |                    |                        |
|                         | Model 1            | Ref                                                        | 1.5 (0.8-3.0) | 2.2 (1.2-4.2) | 3.7 (2.0-6.9) | 6.5 (3.6-11.6) | <0.01              | 0.59                   |
|                         | Model 2            | Ref                                                        | 1.3 (0.7-2.6) | 1.8 (0.9-3.5) | 2.9 (1.5-5.5) | 4.6 (2.4-8.7)  | <0.01              | 0.55                   |

\*Model 1: adjusting for age, sex, race, study center, cigarette smoking, and physical activity

Model 2: further adjusting for systolic blood pressure, HDL cholesterol, LDL cholesterol, triglycerides, and fasting glucose.

Each covariate was measured at the same examination as the corresponding waist circumference.

**Web Table 6.** Adjusted\* odds ratios (95% confidence interval) for risk of high coronary calcification (CAC) (>90<sup>th</sup> percentile) at year 20 according to 3 indices of year 20 waist circumference (WST) and its history (WST at year 0, linear slope of WST from year 0 to year 20, and fluctuations in WST during 20 years) in the CARDIA Study

|                    | Quintile of year 0 WST (cm, median)                                      |               |               |               |               | P <sub>trend</sub> |
|--------------------|--------------------------------------------------------------------------|---------------|---------------|---------------|---------------|--------------------|
|                    | Q1(65)                                                                   | Q2(69)        | Q3(73)        | Q4(80)        | Q5(91)        |                    |
| Cases/participants | 29/452                                                                   | 31/433        | 38/456        | 51/463        | 74/439        |                    |
| Unadjusted %       | 6.4 %                                                                    | 7.2 %         | 8.3 %         | 11.0 %        | 16.9 %        |                    |
| Model 1            | Ref                                                                      | 1.0 (0.6-1.7) | 1.2 (0.7-2.0) | 1.4 (0.8-2.3) | 2.1 (1.3-3.5) | <0.01              |
| Model 2            | Ref                                                                      | 1.0 (0.6-1.7) | 1.2 (0.7-2.0) | 1.3 (0.8-2.3) | 1.9 (1.1-3.2) | 0.02               |
|                    | Quintile of linear slope of WST from year 0 to year 20 (cm/year, median) |               |               |               |               | P <sub>trend</sub> |
|                    | Q1(0.12)                                                                 | Q2(0.41)      | Q3(0.63)      | Q4(0.90)      | Q5(1.32)      |                    |
| Cases/participants | 66/447                                                                   | 46/450        | 30/448        | 49/449        | 32/449        |                    |
| Unadjusted %       | 14.7 %                                                                   | 12.7 %        | 7.6 %         | 8.9 %         | 5.8 %         |                    |
| Model 1            | Ref                                                                      | 0.7 (0.5-1.1) | 0.5 (0.3-0.7) | 0.8 (0.5-1.2) | 0.5 (0.3-0.8) | <0.01              |
| Model 2            | Ref                                                                      | 0.7 (0.5-1.1) | 0.4 (0.3-0.7) | 0.7 (0.4-1.1) | 0.4 (0.3-0.8) | <0.01              |
|                    | Quintile of fluctuations in WST during 20 years (cm, median)             |               |               |               |               | P <sub>trend</sub> |
|                    | Q1(1.49)                                                                 | Q2(2.24)      | Q3(2.98)      | Q4(3.92)      | Q5(5.81)      |                    |
| Cases/participants | 40/447                                                                   | 29/449        | 45/449        | 45/449        | 64/449        |                    |
| Unadjusted %       | 9.0 %                                                                    | 6.5 %         | 10.0%         | 10.0 %        | 14.3 %        |                    |
| Model 1            | Ref                                                                      | 0.7 (0.4-1.2) | 1.0 (0.6-1.6) | 1.0 (0.6-1.6) | 1.4 (0.9-2.3) | 0.03               |
| Model 2            | Ref                                                                      | 0.7 (0.4-1.1) | 1.0 (0.6-1.6) | 1.0 (0.6-1.6) | 1.4 (0.8-2.2) | 0.04               |

\* This table presents the results from 2 separate models with different covariates. Each model had year 0 WST, slope of WST from year 0 to year 20, fluctuations in WST during year 0 to year 20, and covariates measured at year 20. Covariates for model 1 were age, sex, race, study center, cigarette smoking, and physical activity. Covariates for model 2 were covariates for model 1 plus systolic blood pressure, HDL cholesterol, LDL cholesterol, triglycerides, and fasting glucose.

**Web Table 7.** Adjusted\* odds ratios (95% confidence interval) for risk of high common carotid artery intima media thickness (IMT) (>90<sup>th</sup> percentile) at year 20 according to 3 indices of year 20 waist circumference (WST) and its history (WST at year 0, linear slope of WST from year 0 to year 20, and fluctuations in WST during 20 years) in the CARDIA Study

|                    | Quintile of year 0 WST (cm, median)                                      |               |               |               |               | P <sub>trend</sub> |
|--------------------|--------------------------------------------------------------------------|---------------|---------------|---------------|---------------|--------------------|
|                    | Q1(65)                                                                   | Q2(69)        | Q3(73)        | Q4(80)        | Q5(91)        |                    |
| Cases/participants | 18/452                                                                   | 26/433        | 42/456        | 56/463        | 83/439        |                    |
| Unadjusted %       | 4.0%                                                                     | 6.0%          | 9.2%          | 12.1%         | 18.9%         |                    |
| Model 1            | Ref                                                                      | 1.3 (0.7-2.5) | 2.3 (1.3-4.1) | 2.8 (1.6-5.0) | 4.8 (2.8-8.5) | <0.01              |
| Model 2            | Ref                                                                      | 1.2 (0.7-2.4) | 2.2 (1.2-4.0) | 2.6 (1.4-4.6) | 3.6 (2.0-6.6) | <0.01              |
|                    | Quintile of linear slope of WST from year 0 to year 20 (cm/year, median) |               |               |               |               | P <sub>trend</sub> |
|                    | Q1(0.12)                                                                 | Q2(0.41)      | Q3(0.63)      | Q4(0.90)      | Q5(1.32)      |                    |
| Cases/participants | 27/447                                                                   | 42/450        | 40/448        | 51/449        | 65/449        |                    |
| Unadjusted %       | 6.0%                                                                     | 9.3%          | 8.9%          | 11.4%         | 14.5%         |                    |
| Model 1            | Ref                                                                      | 1.9 (1.1-3.2) | 1.5 (0.9-2.6) | 2.1 (1.2-3.6) | 2.7 (1.6-4.6) | <0.01              |
| Model 2            | Ref                                                                      | 2.0 (1.2-3.6) | 1.5 (0.8-2.6) | 2.1 (1.2-3.6) | 2.6 (1.5-4.5) | <0.01              |
|                    | Quintile of fluctuations in WST during 20 years (cm, median)             |               |               |               |               | P <sub>trend</sub> |
|                    | Q1(1.49)                                                                 | Q2(2.24)      | Q3(2.98)      | Q4(3.92)      | Q5(5.81)      |                    |
| Cases/participants | 22/447                                                                   | 41/449        | 53/449        | 48/449        | 61/449        |                    |
| Unadjusted %       | 4.9%                                                                     | 9.1%          | 11.8%         | 10.7%         | 13.6%         |                    |
| Model 1            | Ref                                                                      | 1.6 (0.9-2.8) | 1.8 (1.0-3.1) | 1.5 (0.9-2.6) | 1.6 (0.9-2.9) | 0.19               |
| Model 2            | Ref                                                                      | 1.5 (0.8-2.6) | 1.7 (1.0-2.9) | 1.4 (0.8-2.4) | 1.5 (0.8-2.6) | 0.34               |

\* This table presents the results from 2 separate models with different covariates. Each model had year 0 WST, slope of WST from year 0 to year 20, fluctuations in WST during year 0 to year 20, and covariates measured at year 20. Covariates for model 1 were age, sex, race, study center, cigarette smoking, and physical activity. Covariates for model 2 were covariates for model 1 plus systolic blood pressure, HDL cholesterol, LDL cholesterol, triglycerides, and fasting glucose.

**Web Table 8.** Adjusted\* odds ratios (95% confidence interval) for progression of coronary calcification (CAC) with 3 indices of year 15 waist circumference (WST) and its history (WST at year 0, linear slope of WST from year 0 to year 15, and fluctuations in WST during 15 years) in the CARDIA Study\*

|                    | Quintile of year 0 WST (cm, median)                                      |               |               |               |               | P <sub>trend</sub> |
|--------------------|--------------------------------------------------------------------------|---------------|---------------|---------------|---------------|--------------------|
|                    | Q1(65)                                                                   | Q2(69)        | Q3(73)        | Q4(80)        | Q5(91)        |                    |
| Cases/participants | 26/452                                                                   | 30/433        | 32/456        | 49/463        | 70/439        |                    |
| Unadjusted %       | 5.8%                                                                     | 6.9%          | 7.0%          | 10.6%         | 16.0%         |                    |
| Model 1            | Ref                                                                      | 1.1 (0.6-1.9) | 1.0 (0.6-1.8) | 1.4 (0.8-2.3) | 2.3 (1.4-3.9) | <0.01              |
| Model 2            | Ref.                                                                     | 1.0 (0.6-1.7) | 0.9 (0.5-1.6) | 1.1 (0.7-2.0) | 1.7 (1.0-3.0) | 0.03               |
|                    | Quintile of linear slope of WST from year 0 to year 15 (cm/year, median) |               |               |               |               | P <sub>trend</sub> |
|                    | Q1(0.06)                                                                 | Q2(0.39)      | Q3(0.66)      | Q4(0.97)      | Q5(1.50)      |                    |
| Cases/participants | 51/447                                                                   | 39/449        | 45/449        | 41/449        | 31/449        |                    |
| Unadjusted %       | 11.4%                                                                    | 8.7%          | 10.0%         | 9.1%          | 6.9%          |                    |
| Model 1            | Ref                                                                      | 0.7 (0.4-1.1) | 0.8 (0.5-1.3) | 0.7 (0.4-1.1) | 0.6 (0.3-0.9) | 0.05               |
| Model 2            | Ref                                                                      | 0.6 (0.6-1.0) | 0.7 (0.4-1.0) | 0.5 (0.3-0.9) | 0.4 (0.2-0.7) | <0.01              |
|                    | Quintile of fluctuations in WST during 15 years (cm, median)             |               |               |               |               | P <sub>trend</sub> |
|                    | Q1(1.29)                                                                 | Q2(2.02)      | Q3(2.75)      | Q4(3.73)      | Q5(5.60)      |                    |
| Cases/participants | 36/447                                                                   | 30/449        | 40/449        | 39/449        | 62/449        |                    |
| Unadjusted %       | 8.1%                                                                     | 6.7%          | 8.9%          | 8.7%          | 13.8%         |                    |
| Model 1            | Ref                                                                      | 0.7 (0.4-1.2) | 1.0 (0.6-1.7) | 1.0 (0.6-1.6) | 1.4 (0.9-2.4) | 0.05               |
| Model 2            | Ref                                                                      | 0.7 (0.4-1.2) | 1.0 (0.6-1.6) | 0.9 (0.5-1.5) | 1.4 (0.8-2.3) | 0.08               |

\* This table presents the results from 2 separate models with different covariates. Each model had year 0, slope of BMI from year 0 to year 15, fluctuations in BMI during year 0 to year 15, and covariates measured at year 15. Covariates for model 1 were age, sex, race, study center, cigarette smoking, and physical activity. Covariates for model 2 were covariates for model 1 plus systolic blood pressure, HDL cholesterol, LDL cholesterol, triglycerides, and fasting glucose.
